# Supplementary material for: Radiation dose-response (a Bayesian model) in the radiotherapy of the localized prostatic adenocarcinoma: the reliability of PSA slope changes as a response surrogate endpoint
Source: PeerJ. 2019 Jul 1;7:e7172. doi: 10.7717/peerj.7172 (PMC6610535; doi:10.7717/peerj.7172)
Supplement: Supplemental Information 1 — Characteristics of 195 prostate cancer patients treated with radiotherapy at the Iran cancer institute between 2007 to 2012. [file peerj-07-7172-s001.xlsx]

## Sheet: Sheet1
cod of patient	patient	year	Event	Metastaz	HT	Age	T.Stage	Gleason	Total.Radiation.Dose	mean	iPSA	lniPSA	slpoe	rep 1	mean	No-mon of fallow	No-rep
1	1	88	0	0	1	65	1	6	70	0.523636	12	2.49321	-0.136069	1	0.523636	35.06	11
2	10	88	0	0	1	60	2	7	66	0.226833	1.01	0.10436	-0.0175868	0.32	0.226833	32.96	12
3	11	88	0	0	1	72	2	7	70	0.467273	1.16	0.231112	-0.035254	1.13	0.467273	34.16	11
4	12	88	0	0	1	69	1	5	70	0.1	13	2.57261	-0.221926	0.1	0.1	25.83	6
5	14	88	0	0	1	77	1	7	74	0.276	30.4	3.41773	-0.988325	0.3	0.276	25.66	5
6	22	88	0	0	1	76	2	7	70	0.120833	6.3	1.8563	-0.0759625	0.7	0.120833	38.2	12
7	30	88	0	0	1	71	3	4	60	0.23	0.5	-0.510826	-0.0102047	0.2	0.23	32.46	10
8	32	88	0	0	1	69	2	7	70	0.646667	8.8	2.18605	-0.0776044	0.06	0.646667	38.26	12
9	37	88	0	0	1	75	1	7	70	0.90875	16.9	2.83321	-0.346661	0.7	0.90875	34.06	8
10	41	88	0	0	1	74	2	6	70	0.573333	60	4.09601	-0.7994	3.3	0.573333	45.56	9
11	44	88	0	0	0	54	1	6	70	2.53333	8.1	2.10413	-0.324737	5	2.53333	23.1	6
12	45	88	0	0	1	72	2	5	70	0.25375	50	3.91402	-0.802907	0.66	0.25375	27.63	8
13	49	88	0	0	1	57	3	8	66	0.715714	4.7	1.56862	-0.0594874	0.1	0.715714	22.13	7
14	60	88	0	0	1	67	2	7	70	0.138571	14.5	2.68102	-0.428325	0.09	0.138571	27.73	7
15	62	88	0	0	1	55	1	4	60	5.8625	4.4	1.50408	-0.00973089	5.7	5.8625	31.4	8
16	64	88	0	0	1	70	1	7	70	0.344455	13.9	2.63906	-0.197835	0.54	0.344455	40.86	11
17	75	87	1	0	1	54	2	7	66	0.9	19	2.94969	-0.359902	0.3	0.9	22.66	7
18	79	87	0	0	1	54	2	9	66	20.7514	48.6	3.88568	-1.17689	54	20.7514	59.3	7
19	81	87	0	0	1	76	2	7	70	0.82	6.5	1.88707	-0.140108	0.9	0.82	24.3	5
20	85	87	0	0	1	65	1	7	70	0.5125	15.3	2.73437	-0.19522	0.5	0.5125	39.7	8
21	86	87	1	0	1	77	1	9	70	2.825	22	3.09558	-0.25435	5.97	2.825	44.63	10
22	100	87	0	0	1	62	2	7	70	0.291667	9	2.20827	-0.0709979	0.3	0.291667	52.03	12
23	105	87	0	0	1	63	2	7	70	0.640882	2.4	0.916291	-0.0051224	2.7	0.640882	46.56	17
24	106	87	0	0	1	78	1	6	70	0.392308	15.9	2.77259	-0.14145	0.1	0.392308	49.4	13
25	107	87	0	0	1	56	2	7	30	0.118125	0.4	-0.693147	-0.00668285	0.45	0.118125	52.53	16
26	108	87	0	0	1	74	2	6	70	0.5708	1.1	0.182322	-0.0733953	2.8	0.5708	26.86	5
27	110	87	0	0	1	80	1	4	44	0.112	13	2.57261	-0.130821	0.3	0.112	43.43	10
28	111	87	0	0	1	77	1	7	70	0.197692	50	3.91402	-0.392333	0.5	0.197692	38.66	13
29	124	87	0	0	1	65	2	6	66	0.471	220	5.39408	-3.05205	0.2	0.471	36.43	10
30	125	87	0	0	1	83	1	7	70	0.0833333	27	3.29953	-0.351748	0.1	0.0833333	37.9	9
31	128	87	0	0	1	55	1	7	70	0.306667	32.6	3.48738	-0.329895	0.6	0.306667	39.5	12
32	133	87	1	1	1	70	4	9	70	0.311667	20.2	3.01062	-0.376096	0.8	0.311667	32.93	6
33	137	86	1	0	1	70	4	7	70	1.36667	20	3.00072	-0.261972	0.3	1.36667	33.93	6
34	138	86	1	0	1	62	3	8	56	21.95	0.8	-0.105361	1.36751	0.75	21.95	27.8	5
35	144	86	1	0	1	55	1	6	46	4.8	88.3	4.48187	-1.49573	23.3	4.8	39.03	8
36	147	86	0	0	1	67	2	7	66	3.09077	100	4.60617	-0.873679	29.8	3.09077	59.56	13
37	148	86	0	0	1	68	2	8	60	4.55889	1.5	0.470004	0.0384953	8.5	4.55889	67.76	18
38	149	86	0	0	1	72	2	7	70	0.844875	16	2.77882	-0.0586255	0.3	0.844875	52.76	16
39	157	86	0	0	1	66	2	7	66	0.192857	10.9	2.3979	-0.213099	0.25	0.192857	36.46	7
40	159	86	0	0	1	75	2	2	70	6.62	19	2.94969	-1.58857	27	6.62	15.83	5
41	165	86	0	0	1	71	1	3	70	1.14505	17	2.83908	-0.0907693	0.1	1.14505	59.46	19
42	166	86	0	0	1	78	1	5	66	0.84	9	2.20827	-0.221081	0.5	0.84	29.7	5
43	179	90	0	0	1	75	2	6	70	0.256	19.3	2.96527	-0.812376	0.4	0.256	22.23	5
44	180	90	1	0	1	74	2	8	70	16.996	8.8	2.18605	0.697661	0.3	16.996	51.76	10
45	207	90	0	0	0	70	1	6	72	4.17143	5	1.62924	-0.113998	7.6	4.17143	46.13	7
46	213	90	0	0	1	79	2	6	70	0.45	0.1	-1.60944	-0.157505	0.05	0.45	25.46	5
47	231	90	0	0	1	61	2	7	72	0.81	34	3.5293	-1.50992	2.7	0.81	15.36	5
48	237	90	0	0	1	68	2	5	70	0.2	3	1.1314	-0.131244	0.5	0.2	16.5	5
49	238	90	0	0	1	82	2	7	70	0.27	5	1.62924	-0.234538	0.15	0.27	18.76	5
50	262	90	0	0	1	88	1	7	70	10.096	61	4.11251	-2.64341	48.5	10.096	23.86	5
51	266	90	0	0	1	57	2	7	72	3.858	15.5	2.74727	-1.03235	18.4	3.858	19.93	5
52	270	89	0	0	1	75	2	6	70	0.318333	5.2	1.66771	-0.196946	1	0.318333	21.33	6
53	273	89	0	0	1	59	2	8	70	0.136	33.8	3.52342	-1.39214	0.1	0.136	24.2	5
54	276	89	1	1	1	75	4	8	30	3.61375	10.2	2.33214	-0.375051	19	3.61375	26.4	8
55	279	89	0	0	1	65	2	9	70	4.12429	27	3.29953	-0.587455	28	4.12429	52.26	7
56	286	89	0	0	1	73	3	8	70	0.494429	9.7	2.28238	-0.349245	0.5	0.494429	19.66	7
57	295	89	0	0	1	70	1	6	70	0.278	11.2	2.4248	-0.436424	0.12	0.278	23.43	5
58	296	89	0	0	1	67	1	8	70	0.157143	5.2	1.66771	-0.134397	0.3	0.157143	22.96	7
59	297	89	0	0	1	65	2	6	72	2.27433	7.73	2.05796	-0.0100788	4.88	2.27433	30.86	6
60	298	89	0	0	1	65	2	8	70	0.011	2.5	0.955511	-0.0735506	0.01	0.011	21.9	5
61	302	89	0	1	1	61	3	9	30	12.1	15.7	2.76001	0.715015	3.6	12.1	19.66	11
62	303	89	0	0	1	75	2	7	72	0.264	63	4.14472	-2.80183	0.3	0.264	21.2	5
63	308	89	0	0	1	71	2	7	70	0.48	19.6	2.98062	-0.743671	0.1	0.48	23.36	5
64	312	89	0	0	1	69	2	7	70	5.86571	14.6	2.68785	-1.08165	38.4	5.86571	25.73	7
65	319	89	0	0	1	73	2	7	70	0.42	18.2	2.9069	-0.670628	0.3	0.42	23.93	5
66	320	89	0	0	1	75	2	9	70	1.62	84	4.43201	-3.66783	1.5	1.62	16.9	5
67	321	89	0	0	1	64	2	7	70	0.342857	20.5	3.02529	-0.691784	0.1	0.342857	22.43	7
68	325	89	1	1	1	79	4	9	30	23.9087	8.7	2.17475	1.20302	19.75	23.9087	17.06	7
69	326	89	0	0	1	74	2	9	46	0.998571	30	3.40453	-0.733509	1.1	0.998571	31.53	7
70	330	89	0	0	1	59	3	8	70	9.12	6	1.80829	0.385155	0.4	9.12	31.43	5
71	7	88	1	0	0	64	3	7	60	7.2	36	3.58629	-0.124893	3.3	7.2		3
72	25	88	0	0	1	77	1	8	70	0.25	26.8	3.29213	-0.0515807	0.4	0.25		4
73	29	88	0	0	1	61	4	8	70	0.6	8.6	2.16332	-0.0128643	1.8	0.6		4
74	36	88	0	0	1	74	1	6	70	2.95	11.5	2.45101	-0.000897	0.1	2.95		4
75	38	88	0	0	0	65	1	6	70	1.07333	6.76	1.92571	-0.015495	1.22	1.07333		3
76	50	88	0	0	1	75	2	6	70	3.025	4.7	1.56862	-0.00446074	5.95	3.025		2
77	57	88	0	0	0	57	1	6	70	3.175	6.5	1.88707	-0.0164519	9.5	3.175		4
78	59	88	1	0	1	73	4	8	30	18.4	19.5	2.97553	-0.141962	29	18.4		2
79	63	88	0	0	1	75	1	6	70	0.166667	28	3.33577	-0.0715044	0.1	0.166667		3
80	66	88	0	0	0	71	2	8	70	17.5	23	3.13983	0.0343631	13	17.5		2
81	69	88	1	0	1	69	2	7	66	1.5075	1.5	0.470004	0.00620987	0.04	1.5075		4
82	72	87	1	0	0	75	2	8	70	1.13333	21	3.04927	-0.0449218	1	1.13333		3
83	74	87	1	1	1	48	4	7	30	5.1725	65	4.17592	-0.0937141	20.1	5.1725		4
84	89	87	0	0	1	72	3	7	74	3.84	5.6	1.74047	-0.0282081	7.44	3.84		2
85	90	87	0	0	1	75	2	8	74	0.75	55	4.00915	-0.152189	0.9	0.75		2
86	92	87	1	1	1	58	4	7	30	317.333	990	6.89781	-2.72988	280	317.333		3
87	98	87	1	1	1	67	4	7	66	0.2	79.65	4.3789	-0.140484	0.3	0.2		2
88	99	87	0	0	1	73	1	7	70	0.1625	8.4	2.14007	-0.00741695	0.2	0.1625		4
89	101	87	0	0	1	77	2	7	74	0.0675	6.8	1.93152	-0.0139782	0.05	0.0675		4
90	104	87	0	0	1	76	2	7	70	6.03333	23	3.13983	-0.0510314	17.7	6.03333		3
91	120	87	0	0	1	68	2	7	70	1.41	12.8	2.55723	-0.0167264	4.8	1.41		4
92	122	87	0	0	1	64	1	5	70	6.03333	13.2	2.58776	-0.0514304	16.5	6.03333		3
93	150	86	0	0	1	74	2	7	70	7.7	46.6	3.84374	-0.353917	100	7.7		2
94	160	86	0	0	1	54	1	9	62	0.1	15	2.71469	-0.0290634	0.1	0.1		2
95	167	86	0	0	1	71	4	7	66	0.433333	10	2.31254	-0.0289397	0.9	0.433333		3
96	172	86	0	0	1	65	1	7	70	0.1	41.1	3.71844	-0.10666	0.1	0.1		2
97	175	86	1	1	1	75	4	10	30	0.81	105	4.65491	-0.507734	0.09	0.81		2
98	176	90	0	0	1	78	2	4	70	1.4075	23.7	3.16969	-0.0311963	3.4	1.4075		4
99	178	90	0	0	1	62	2	7	70	6.55	10.3	2.34181	-0.0364572	13	6.55		2
100	185	90	0	0	1	77	2	7	70	0.85	24.3	3.19458	-0.0293273	0.6	0.85		4
101	186	90	0	0	1	69	2	7	70	0.25	5.3	1.6864	-0.0105004	0.1	0.25		2
102	187	90	0	0	1	73	2	4	70	0.3075	8.92	2.19944	-0.0116147	0.1	0.3075		4
103	188	90	0	0	1	75	2	7	72	1.26667	18.3	2.91235	-0.0593117	2.3	1.26667		3
104	189	90	0	0	1	68	2	9	70	0.133333	1.4	0.405465	-0.00418037	0.1	0.133333		3
105	192	90	0	0	1	73	2	5	70	0.3	3.9	1.38629	-0.014655	0.3	0.3		2
106	194	90	0	0	1	75	2	7	70	0.2	16	2.77882	-0.0639076	0.3	0.2		2
107	197	90	0	0	0	57	2	7	66	12	12.7	2.54945	-0.00131777	12	12		3
108	199	90	0	0	1	63	2	6	70	0.245	25	3.22287	-0.165438	0.36	0.245		2
109	201	90	0	0	1	79	2	8	70	0.27	9.1	2.2192	-0.0236289	0.1	0.27		2
110	206	90	0	0	0	59	2	5	70	0.75	6	1.80829	-0.0206668	0.9	0.75		2
111	208	90	0	0	1	72	2	6	70	0.3	9.8	2.29253	-0.0268229	0.5	0.3		2
112	209	90	0	0	1	73	2	7	66	1.725	1.61	0.536493	-0.00485757	2.65	1.725		2
113	214	90	0	0	1	66	2	6	70	0.45	8.8	2.18605	-0.0222441	0.8	0.45		2
114	219	90	0	0	1	71	2	7	72	23.6333	29.16	3.37622	-0.168082	70	23.6333		3
115	221	90	0	0	1	63	1	2	70	5.16667	8.6	2.16332	-0.0198285	8.1	5.16667		3
116	228	90	0	0	1	67	1	7	72	4.385	7.1	1.97408	-0.00575633	7.6	4.385		4
117	230	90	0	0	1	69	1	5	70	1.025	6.1	1.82455	-0.00898882	0.9	1.025		4
118	233	90	0	0	1	77	2	9	72	0.1	11.6	2.45959	-0.0341968	0.1	0.1		3
119	234	90	0	0	1	71	2	7	70	1.745	7.6	2.04122	-0.00585884	4.6	1.745		4
120	235	90	0	0	1	71	1	6	72	0.51	8.09	2.10291	-0.022856	1	0.51		2
121	241	90	0	0	1	67	1	7	70	0.2	24.8	3.21487	-0.0523018	0.4	0.2		3
122	242	90	0	0	1	74	2	6	70	0.17	19.3	2.96527	-0.0419471	0.24	0.17		2
123	249	90	0	0	1	64	2	8	50	0.125	100	4.60617	-0.169093	0.1	0.125		4
124	251	90	0	0	1	80	2	8	70	2	56	4.02714	-0.144343	0.8	2		4
125	254	90	1	1	1	50	4	8	30	0.07	320	5.76863	-0.306008	0.07	0.07		3
126	255	90	0	0	1	72	2	6	70	0.45	11.5	2.45101	-0.0302167	0.8	0.45		2
127	260	90	0	0	1	63	1	7	70	1.16275	5.5	1.72277	-0.00335937	3.6	1.16275		4
128	261	90	1	1	1	85	4	6	20	215	295	5.68731	0.274743	124	215		2
129	263	90	0	0	1	71	2	6	72	4.73333	20	3.00072	-0.0156921	8	4.73333		3
130	274	89	0	0	1	73	2	5	60	0.4475	1.5	0.470004	-0.00109465	0.35	0.4475		4
131	275	89	1	0	1	77	2	7	70	58.7	14.5	2.68102	0.224831	17.4	58.7		2
132	277	89	0	0	0	58	2	6	70	1.45	9.1	2.2192	-0.0197622	1.6	1.45		2
133	280	89	1	1	1	70	4	7	30	31.775	58	4.06217	-0.0163752	19.1	31.775		4
134	285	89	0	0	1	78	2	8	72	6.8	8.9	2.19722	-0.0345599	13	6.8		2
135	290	89	0	0	1	67	2	9	70	2.5	37.5	3.627	-0.142907	0.3	2.5		2
136	292	89	0	0	1	60	2	6	70	1.28667	18.7	2.93386	-0.045413	0.9	1.28667		3
137	294	89	0	0	1	66	3	7	70	0.166667	40	3.69138	-0.0510938	0.2	0.166667		3
138	299	89	0	0	1	75	2	9	72	12.14	54.83	4.00606	-0.154604	24	12.14		2
139	301	89	0	0	1	61	2	9	70	7.105	20	3.00072	-0.0448365	16.8	7.105		4
140	304	89	0	0	1	67	2	7	70	0.31	20	3.00072	-0.0533889	0.7	0.31		3
141	306	89	1	1	0	56	3	9	30	13.5	21	3.04927	-0.0785154	26.6	13.5		2
142	307	89	0	0	1	57	2	7	70	0.1	50	3.91402	-0.103459	0.1	0.1		2
143	309	89	0	0	1	75	1	7	70	0.16	9.9	2.30259	-0.0136562	0.03	0.16		4
144	313	89	0	0	1	68	2	5	70	3.5	4.9	1.60944	-0.0222262	6.7	3.5		2
145	317	89	0	0	1	71	3	6	70	0.375	100	4.60617	-0.117658	0.1	0.375		4
146	327	89	0	0	1	63	2	8	70	0.31	26.1	3.26576	-0.0284877	0.03	0.31		3
147	328	89	0	0	1	76	2	7	70	0.2	7	1.96009	-0.0176954	0.05	0.2		3
148	8	88	0	0	1	80	1	7	70	2.7	10.8	2.38876	-0.0329268	2.7	2.7		1
1489	13	88	0	0	0	77	2	8	70	0.1	23.2	3.14845	-0.0747573	0.1	0.1		1
150	20	88	0	0	0	77	1	5	66	0.3	71	4.26409	-1.17833	0.3	0.3		1
151	26	88	1	0	1	74	4	6	46	15.6	38	3.64021	-0.0910569	15.6	15.6		1
152	35	88	0	0	1	83	1	4	70	0.7	32	3.46886	-0.256557	0.7	0.7		1
153	39	88	1	1	1	75	4	8	30	25.49	50	3.91402	-0.172606	25.49	25.49		1
154	46	88	0	0	1	81	1	9	70	0.26	0.08	-1.7148	0.0163636	0.26	0.26		1
155	48	88	0	0	1	70	1	7	72	3.5	30.49	3.42067	-0.374861	3.5	3.5		1
156	54	88	0	0	1	73	4	7	32	2.8	27	3.29953	-0.336111	2.8	2.8		1
157	73	87	1	0	1	71	2	7	70	10	17.3	2.85647	-0.0158009	10	10		1
158	82	87	0	0	0	76	2	5	70	3	13.4	2.60269	-0.0859504	3	3		1
159	91	87	0	0	0	69	2	7	40	41	42	3.74005	-0.00884956	41	41		1
160	97	87	0	0	1	73	1	7	70	0.2	63	4.14472	-0.514754	0.2	0.2		1
161	130	87	0	0	0	67	2	7	60	0.1	10.6	2.37024	-0.198113	0.1	0.1		1
162	132	87	1	0	1	73	1	7	68	27	32.3	3.47816	-0.0220833	27	27		1
163	146	86	1	0	0	72	2	6	66	0.5	36.5	3.60005	-0.457143	7.7	0.5		1
164	153	86	1	1	1	77	4	6	70	52.3	0.9	0	0.00686274	1.95	52.3		1
165	155	86	1	0	0	72	2	6	66	1.95	36.5	3.60005	-0.34698	7.7	1.95		1
166	156	86	1	1	1	62	4	7	60	7.7	0.1	-1.60944	0.006382	1	7.7		1
167	163	86	1	1	1	75	4	10	46	60	62	4.12875	-0.142857	60	60		1
168	168	86	0	0	1	62	2	4	70	10.2	2.1	0.788457	0.0554795	10.2	10.2		1
169	169	86	1	0	1	58	2	9	30	198	150	5.0113	0.0471513	198	198		1
170	171	86	0	0	1	68	2	7	70	0.2	22.8	3.13114	-0.376667	0.2	0.2		1
171	177	90	0	0	1	70	2	6	70	4	15.9	2.77259	-0.0881481	4	4		1
172	181	90	0	0	1	74	2	7	70	8.9	83.1	4.42125	-0.491391	8.9	8.9		1
173	184	90	1	1	1	70	4	7	30	242	60	4.09601	0.49863	242	242		1
174	196	90	0	0	1	62	2	8	68	0.25	42.1	3.74242	-0.284694	0.25	0.25		1
175	202	90	0	0	1	66	3	4	70	0.3	10	2.31254	-0.0836207	0.3	0.3		1
176	204	90	0	0	1	75	2	7	70	1.9	26	3.26194	-0.0610127	1.9	1.9		1
177	210	90	0	0	1	71	2	6	70	0.5	10	2.31254	-0.022093	0.5	0.5		1
178	220	90	0	0	1	73	2	7	70	0.8	81.73	4.40464	-0.152124	0.8	0.8		1
179	225	90	0	0	1	62	2	7	70	0.7	11	2.40695	-0.0046989	0.7	0.7		1
180	236	90	0	0	1	80	3	9	70	0.8	150	5.0113	-1.52245	0.8	0.8		1
181	245	90	0	0	1	67	2	7	70	2	38.7	3.65842	-0.235256	2	2		1
182	246	90	0	0	1	70	2	7	72	0.7	50	3.91402	-0.465094	0.7	0.7		1
183	247	90	0	0	1	74	2	9	70	0.2	21	3.04927	-0.1664	0.2	0.2		1
184	250	90	0	0	1	66	3	8	70	0.5	9.1	2.2192	-0.0475138	0.5	0.5		1
185	253	90	1	1	1	50	4	8	30	5.3	320	5.76863	-2.60083	5.3	5.3		1
186	267	90	0	0	0	75	2	4	72	17.5	13.5	2.61007	0.137931	17.5	17.5		1
187	268	90	0	0	1	74	2	5	70	0.6	7	1.96009	-0.026556	0.6	0.6		1
188	269	90	0	0	1	72	2	9	72	0.67	56.2	4.03069	-0.162845	0.67	0.67		1
189	271	89	1	1	1	69	4	9	30	32.9	11.5	2.45101	0.142667	32.9	32.9		1
190	278	89	0	0	1	76	2	7	66	0.3	35	3.5582	-0.708163	0.3	0.3		1
191	282	89	0	0	1	87	2	5	60	7.3	10.4	2.35138	-0.0070615	7.3	7.3		1
192	284	89	1	0	1	73	3	7	70	0.11	1.64	0.553885	-0.00358314	0.11	0.11		1
193	289	89	0	0	1	72	2	7	72	6.4	12.9	2.56495	-0.141304	6.4	6.4		1
194	310	89	0	0	1	71	2	9	70	0.1	23.94	3.17972	-0.090303	0.1	0.1		1
195	315	89	0	0	1	75	2	7	70	0.4	8.4	2.14007	-0.0467836	0.4	0.4		1
